# Supplementary material for: Iron–copper bimetallic nanoparticles supported on hollow mesoporous silica spheres: an effective heterogeneous Fenton catalyst for orange II degradation
Source: Royal Society of Chemistry journal article supplement (doi:10.1039/c5ra10826h), 2015-01-01
Supplement: c5ra10826h1.pdf [file c5ra10826h1.pdf]

## Electronic Supplementary Information

### **Iron-copper bimetallic nanoparticles supported on hollow mesoporous silica spheres: An effective heterogeneous Fenton catalyst for orange II degradation**

Jing Wang, Chao Liu, Lu Tong, Jiansheng Li\*, Rui Luo, Junwen Qi, Yang Li, Lianjun Wang\*

[\*] J. Wang, C. Liu, L. Tong, Prof. J.S. Li, R. Luo, J.W. Qi, Y. Li, L.J. Wang

Jiangsu Key Laboratory of Chemical Pollution Control and Resources Reuse

School of Environmental and Biological Engineering

Nanjing University of Science and Technology

Nanjing 210094, P.R. China

E-mail: lijsh@mail.njust.edu.cn; wanglj@mail.njust.edu.cn

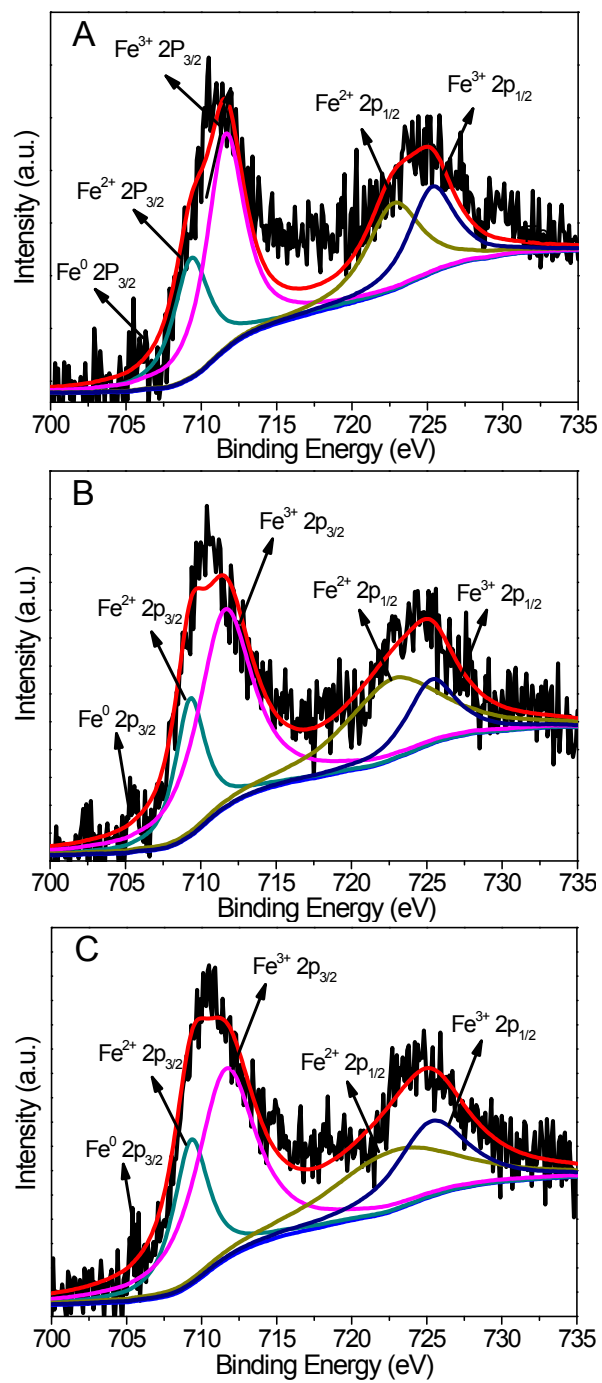

Fig. S1. XPS spectra of Fe in (A) FeCu/HMS, (B) FeCu/MS and (C) Fe/HMS

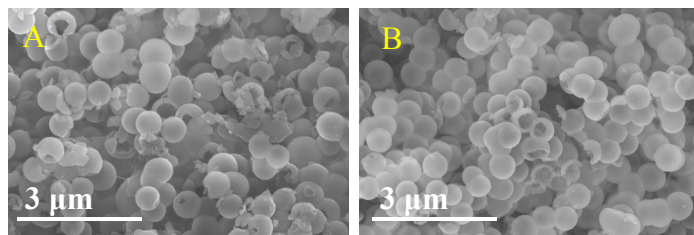

Fig. S2. SEM of hollow sphere before (A) and after (B) removal of template

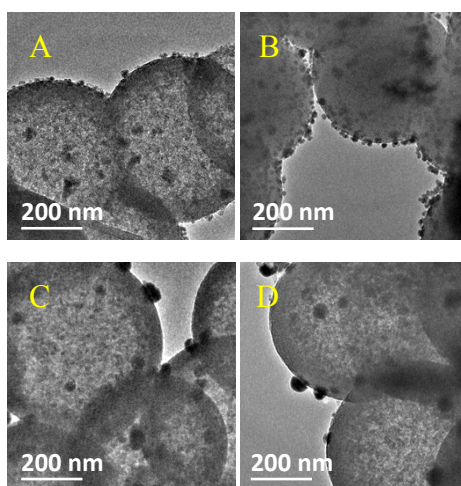

Fig. S3. High-magnification TEM images of (A) FeCu/HMS, (B) FeCu/MS, (C) Fe/HMS and (D) Cu/HMS

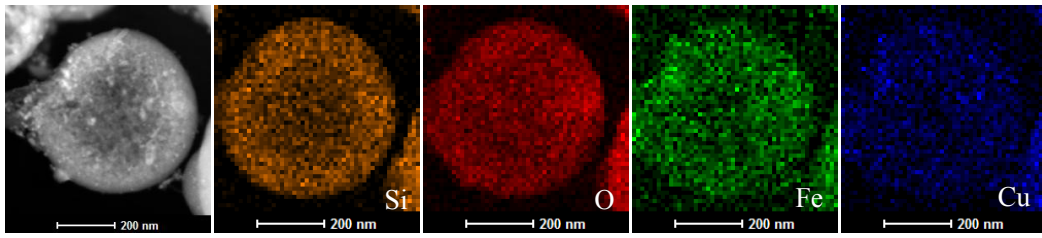

Fig. S4. EDX-STEM images of FeCu/HMS

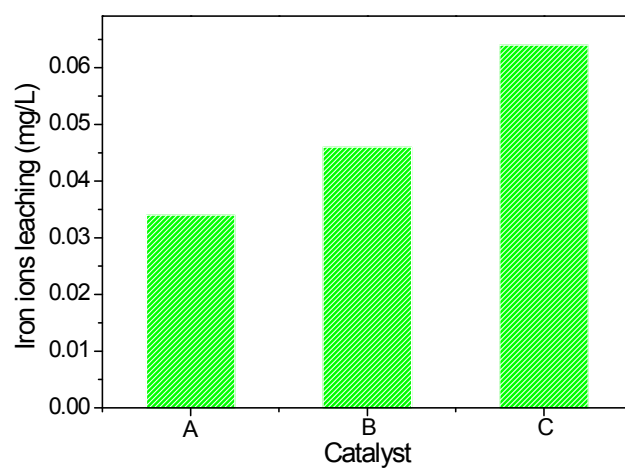

Fig. S5. Iron ions leaching of (A) FeCu/HMS, (B) FeCu/MS and (C) Fe/HMS after reaction 2h under the condition of  $\text{H}_2\text{O}_2$  13.7 mM, catalyst dosage 1g/L, orange II concentration 50 mg/L, pH at 7.0, 30 °C

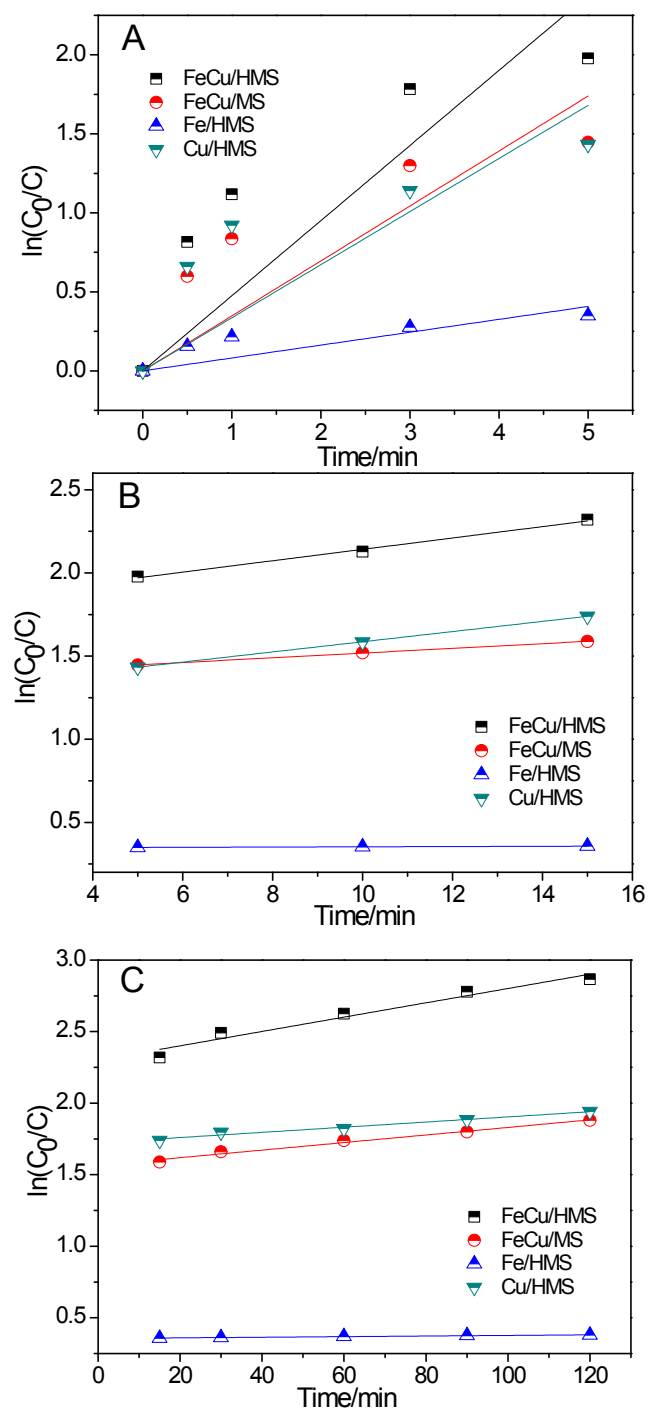

Fig. S6. Kinetics of three stages (A) 0-5min, (B) 5-15min, (C) 15-120min for degradation of 50 mg/L orange II with different catalysts under the condition of  $H_2O_2$  13.7 mM, catalyst dosage 1g/L, pH at 7.0, 30 °C

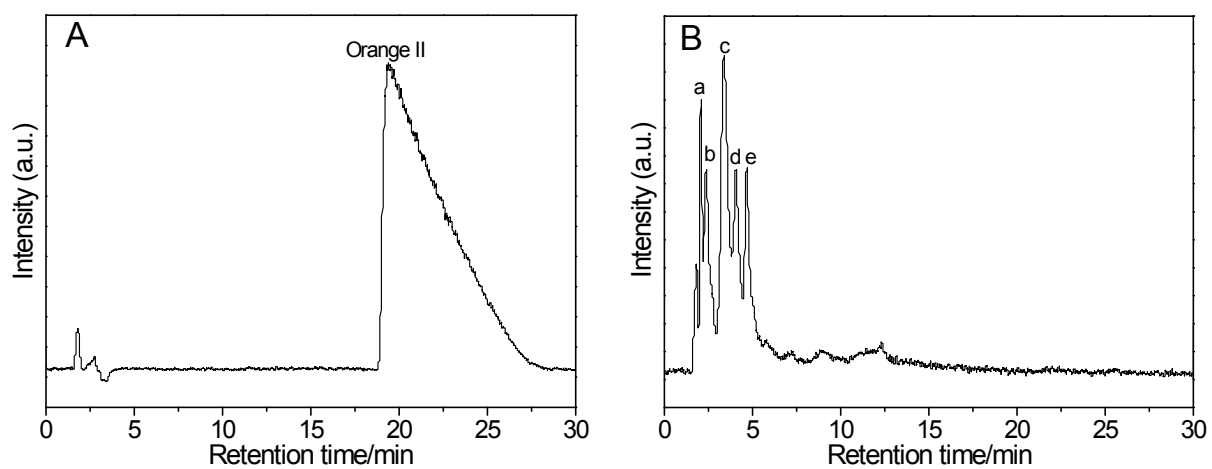

Fig. S7. HPLC diagrams of (A) initial orange II solution and (B) orange II degraded by FeCu/HMS heterogeneous Fenton system after 2h under the condition of  $\text{H}_2\text{O}_2$  13.7 mM, catalyst dosage 1g/L, dye concentration 50 mg/L, pH at 7.0, 30 °C



Table S1 HPLC-MS identified possible reaction products during orange II degradation

| Compound  | Retention time | Chemical name                         | Chemical structure                                                                    |
|-----------|----------------|---------------------------------------|---------------------------------------------------------------------------------------|
| Orange II | 19.41 min      | Orange II                             | 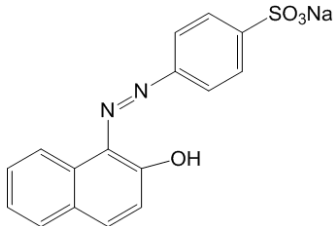   |
| a         | 2.11 min       | 4-formyl-1-Naphthalenecarboxylic acid |   |
| b         | 2.35 min       | 2,3-dihydroxy-1,4-Naphthalenedione    |  |
| c         | 3.38 min       | 2-hydroxy-1,4-Naphthalenedione        |  |
| d         | 4.06 min       | 1,4-Naphthalenedione                  |  |
| e         | 4.67 min       | 2-Carboxy-1,4-naphthoquinone          |  |
